# Supplementary material
Source: publisher site journal article supplement (https://www.dovepress.com/article/243172)
Supplement: Supplementary file 1 [file get_supplementary_file.php]

**Table S1.** **Relationship between TNM stage and PNI, PAB and AGR in patients with colon cancer.**

| **Characteristic** | **TNM stage** | | **χ2** | **P value** |
| --- | --- | --- | --- | --- |
| **Ⅰ/II stage** | **Ⅲ/IV stage** |
| n=112 | n=68 |
| **PAB** |  |  |  |  |
| ≤170mg/L | 28 (32.4) | 24 (19.6) | 2.183 | 0.14 |
| >170mg/L | 84 (79.6) | 44 (48.4) |  |  |
| **PNI** |  |  |  |  |
| Low | 48 (57.2) | 44 (34.8) | 8.083 | 0.004 |
| High | 64 (54.8) | 24 (33.2) |  |  |
| **AGR** |  |  |  |  |
| Low | 36 (37.3) | 24 (22.7) | 0.189 | 0.664 |
| High | 76(74.7) | 44(45.3) |  |  |

**Note:** P-value<0.05 are shown in bold.

**Abbreviations:**

PAB, Prealbumin; PNI, Prognostic nutritional index; AGR, Albumin to globulin ratio; TNM, T, Tumor(Topography), N, Lymph Node, M, Metastasis.

In colon cancer, the cut off values of PNI and AGR are 48.225 and 1.325, respectively.

In rectal cancer, the cut off values of PNI and AGR are 39.625 and 1.615, respectively.

**Table S2. Relationship between TNM stage and PNI, PAB and AGR in patients with rectal cancer.**

| **Characteristic** | **TNM stage** | | **χ2** | **P value** |
| --- | --- | --- | --- | --- |
| **Ⅰ/II stage** | **Ⅲ/IV stage** |
| n=95 | n=86 |
| **PAB** |  |  |  |  |
| ≤170mg/L | 6 (12.6) | 18 (11.4) | 8.382 | 0.004 |
| >170mg/L | 89(82.4) | 68 (74.6) |  |  |
| **PNI** |  |  |  |  |
| Low | 2 (5.2) | 8 (4.8) | 4.479 | 0.034 |
| High | 93 (89.8) | 78 (81.2) |  |  |
| **AGR** |  |  |  |  |
| Low | 52 (54.6) | 52 (49.4) | 0.606 | 0.436 |
| High | 43 (40.4) | 34 (36.6) |  |  |

**Note:** P-value<0.05 are shown in bold.

**Abbreviations:**

PAB, Prealbumin; PNI, Prognostic nutritional index; AGR, Albumin to globulin ratio; TNM, T, Tumor(Topography), N, Lymph Node, M, Metastasis.

In colon cancer, the cut off values of PNI and AGR are 48.225 and 1.325, respectively.

In rectal cancer, the cut off values of PNI and AGR are 39.625 and 1.615, respectively.
